# Supplementary material for: Effectiveness of Artificial Intelligence Mobile App-Guided Prevention and Treatment Protocols on Cancer Patients and Their Impact on Healthcare Workers' Competence
Source: Research Square preprint supplement (doi:10.21203/rs.3.rs-8368116/v1), 2025-12-30
Supplement: Supplementary file 1 [file 081745b2cb3fa40b9ab144df.docx]

**Highlights:**

- Implementation of an AI-guided mobile app for prevention and treatment protocols supported healthcare workers in delivering standardized, evidence-based care to cancer patients.
- The mobile app intervention significantly improved healthcare workers’ competence, including knowledge, clinical decision-making, and adherence to oncology care standards.
- Healthcare workers reported enhanced confidence, communication, and patient management skills following use of the AI-guided app.
- The study demonstrates the feasibility and effectiveness of digital health interventions in oncology settings, providing a scalable model for improving healthcare delivery.
